# Supplementary material for: Local symmetric distortion boosted photon up-conversion and thermometric sensitivity in lanthanum oxide nanospheres
Source: Royal Society of Chemistry journal article supplement (doi:10.1039/c8nr01734d), 2018-01-01
Supplement: c8nr01734d1.pdf [file c8nr01734d1.pdf]

## Supporting Information

### Local Symmetric Distortion Boosted Photon Up-conversion and Thermometric Sensitivity in Lanthanum Oxide Nanospheres

Hao Suo<sup>a</sup>, Xiaoqi Zhao<sup>a</sup>, Zhiyu Zhang<sup>a</sup>, Rui Shi<sup>b</sup>, Yanfang Wu<sup>a</sup>, Jinmeng Xiang<sup>a</sup> and Chongfeng Guo<sup>a\*</sup>

*a. National Key Laboratory of Photoelectric Technology and Functional Materials (Culture Base) in Shaanxi Province, National Photoelectric Technology and Functional Materials & Application of Science and Technology International Cooperation Base, Institute of Photonics & Photon-Technology, Northwest University, Xi'an, 710069, China;*

*b. MOE Key Laboratory of Bioinorganic and Synthetic Chemistry, State Key Laboratory of Optoelectronic Materials and Technologies, School of Chemistry and Chemical Engineering, Sun Yat-sen University, Guangzhou 510275, China*

---

*Author to whom correspondence should be addressed*

*E-mail: [guocf@nwu.edu.cn](mailto:guocf@nwu.edu.cn) (Prof. Guo);*

*Tel & Fax: ±86-29-88302661*

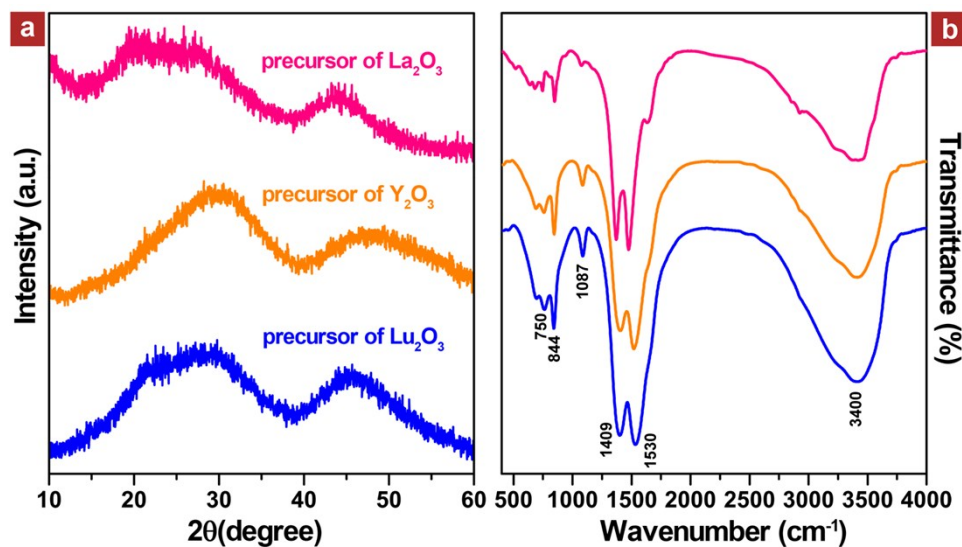

**Figure S1.** (a) XRD patterns and (b) FT-IR spectra of 2% $\text{Er}^{3+}$ /3% $\text{Yb}^{3+}$  co-doped three precursors. All precursor samples exhibited two broad bands without obvious diffraction peaks, which could be inferred as amorphous carbonate hydroxides  $\text{RE}(\text{OH})\text{CO}_3$  ( $\text{RE} = \text{Lu}, \text{Y}$  and  $\text{La}$ ). Three precursor samples exhibited similar FT-IR spectra, in which the broad absorption band at around 3400  $\text{cm}^{-1}$  were assigned to the stretching vibrations of hydroxyl groups. The absorption peaks centered at 750, 844 and 1087  $\text{cm}^{-1}$  in the precursors were attributed to carbonate while the absorption at around 1409 and 1530  $\text{cm}^{-1}$  corresponded to  $\text{COO}^-$  group, which further confirmed the component of the precursors.

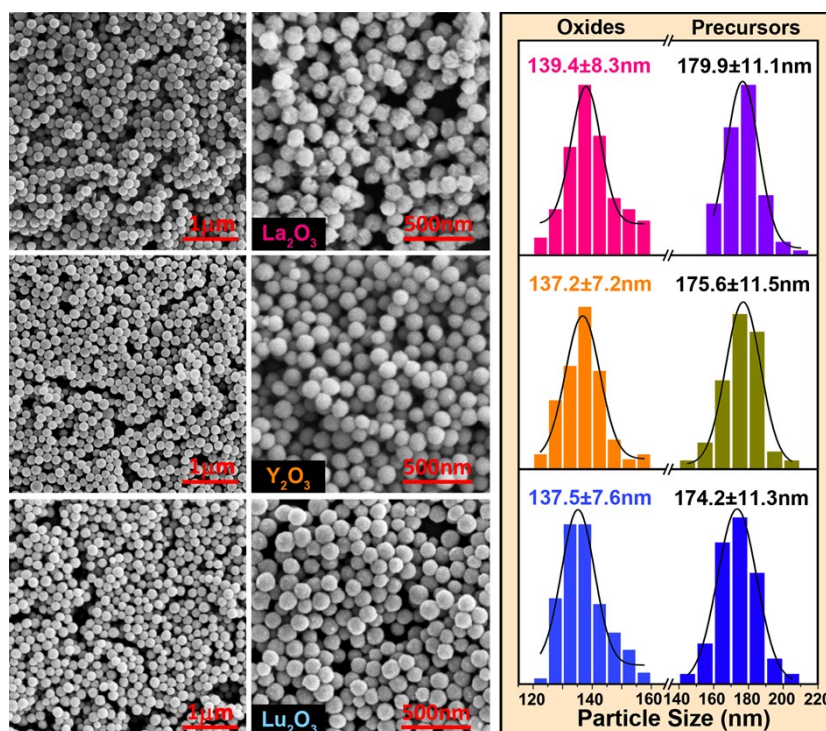

**Figure S2.** SEM images and size distributions of 2%Er<sup>3+</sup>/3%Yb<sup>3+</sup> co-doped precursor and final RE<sub>2</sub>O<sub>3</sub> (RE = Lu, Y and La) samples. The precursor samples of Lu<sub>2</sub>O<sub>3</sub>, Y<sub>2</sub>O<sub>3</sub> and La<sub>2</sub>O<sub>3</sub> exhibited highly monodispersed and regular spherical shape with uniform size of about 174.2 ± 11.3, 175.6 ± 11.5 and 179.9 ± 11.1 nm, respectively. After heating treatment at 800 °C for 3 h, resulting RE<sub>2</sub>O<sub>3</sub> particles still maintained highly dispersive and original spherical shape with rough surfaces and decreased size distributions of 137.2 ± 7.2, 137.5 ± 7.6 and 139.4 ± 8.3 nm.

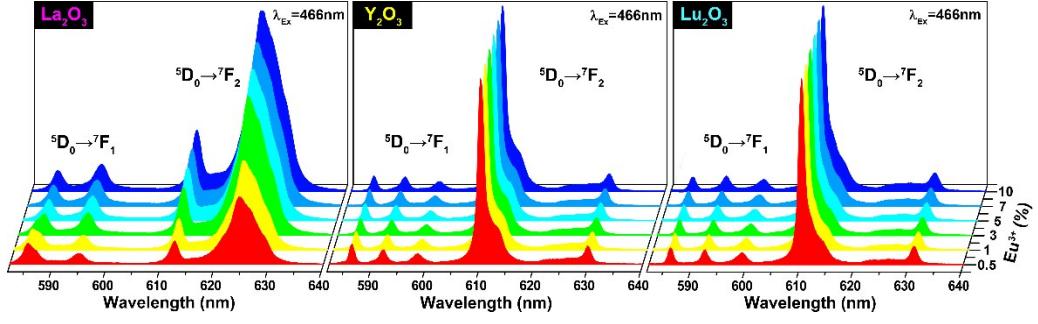

**Figure S3.** Emission spectra of  $\text{RE}_2\text{O}_3: x\text{Eu}^{3+}$  (RE = Lu, Y and La;  $x = 0.5\% \sim 10\%$ ) nanospheres ranging from 580 to 640 nm under 466 nm excitation. All the spectra were normalized at magnetic-dipole (MD)  $^5\text{D}_0 \rightarrow ^7\text{F}_1$  transition for better comparison. With increasing  $\text{Eu}^{3+}$  contents from 0.5% to 10%, the relative emission intensity from  $^5\text{D}_0 \rightarrow ^7\text{F}_2$  transition monotonously increased in  $\text{La}_2\text{O}_3$  while maintained nearly unchanged in  $\text{Lu}_2\text{O}_3$  and  $\text{Y}_2\text{O}_3$  samples.

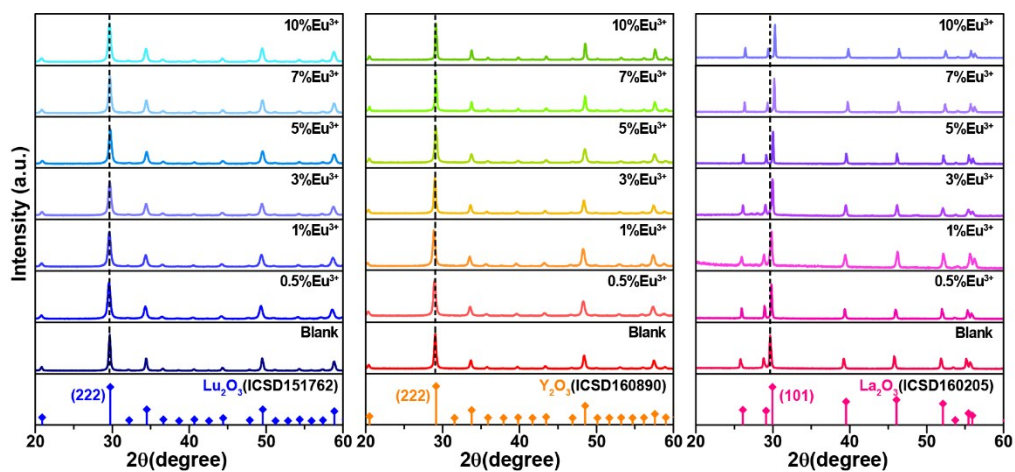

**Figure S4.** XRD patterns of  $\text{RE}_2\text{O}_3: x\text{Eu}^{3+}$  ( $\text{RE} = \text{Lu}, \text{Y}$  and  $\text{La}$ ;  $x = 0\% \sim 10\%$ ) nanospheres along with their standard profiles. All the prepared samples are purity and well-crystallized without secondary phases.

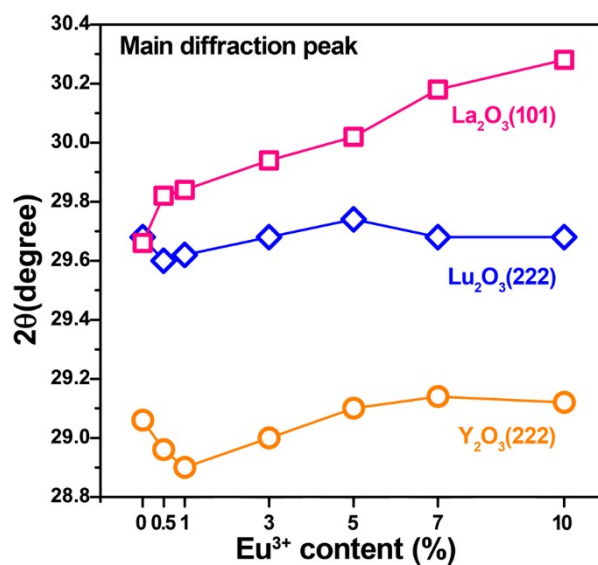

**Figure S5.** The shift of strongest diffraction peaks in XRD patterns of  $\text{RE}_2\text{O}_3: x\text{Eu}^{3+}$  ( $\text{RE} = \text{Lu}, \text{Y}$  and  $\text{La}$ ;  $x = 0\% \sim 10\%$ ) nanospheres. Continuously shift of diffraction peaks (101) from low towards the higher angles was found with increasing  $\text{Eu}^{3+}$  contents in  $\text{La}_2\text{O}_3$  due to the substitution of  $\text{La}^{3+}$  by  $\text{Eu}^{3+}$  ions with much smaller radius. However, no obvious shift was found in diffraction peaks (222) of  $\text{Lu}_2\text{O}_3$  and  $\text{Y}_2\text{O}_3$  samples as increasing  $\text{Eu}^{3+}$  contents. Above results indicated that the introduction of  $\text{Eu}^{3+}$  would result the lattice shrinkage of  $\text{La}_2\text{O}_3$ , yet barely affect the cell volumes of  $\text{Lu}_2\text{O}_3$  and  $\text{Y}_2\text{O}_3$  samples.

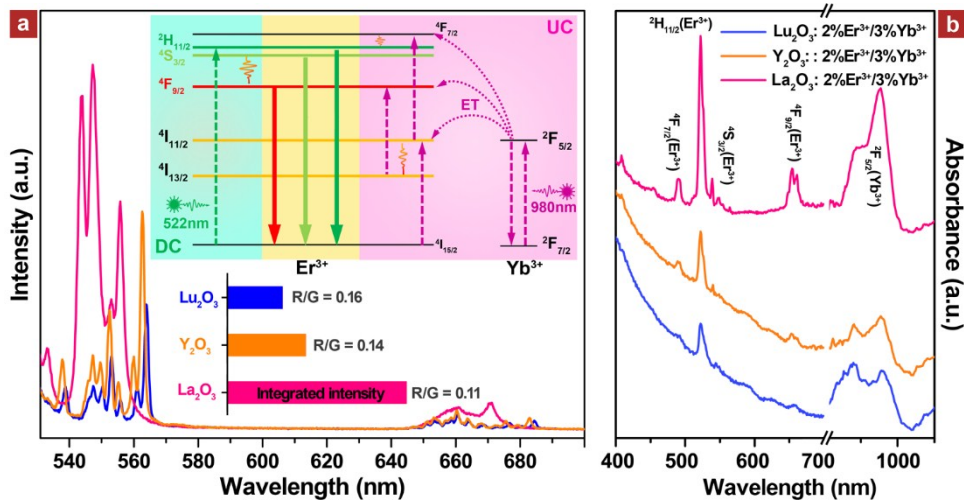

**Figure S6.** (a) DC emission spectra of  $\text{RE}_2\text{O}_3$ : 2% $\text{Er}^{3+}$ /3% $\text{Yb}^{3+}$  (RE = Lu, Y and La) nanospheres with corresponding integrated intensity and R/G ratio under 522 nm excitation, and the inset shows the simplified energy level diagram and possible energy transfer mechanisms in the DC and UC process; (b) UV-vis absorption spectra of three samples. Under 522 nm excitation, trigonal-phased  $\text{La}_2\text{O}_3$  nanospheres exhibited about twice stronger visible emission than that of cubic-phased samples, and the DC emission intensity is mainly associated with the absorption ability around 522 nm and the radiative transition rates of emitting levels of  $\text{Er}^{3+}$  in three samples. This indicated that the lifetime of metastable states  $^4\text{I}_{11/2}$  and  $^4\text{I}_{13/2}$  plays a decisive role in determining UCL efficiency, as depicted in schematic energy level diagram. Local symmetric distortion enhanced f-f absorption and transition probabilities in  $\text{La}_2\text{O}_3$  crystal could be further confirmed *via* UV-vis absorption spectra, from which the characteristic absorption bands at 490, 522, 539, 654 and 977  $\text{nm}^{-1}$  corresponding to  $^4\text{F}_{7/2}$ ,  $^2\text{H}_{11/2}$ ,  $^4\text{S}_{3/2}$ ,  $^4\text{F}_{9/2} \rightarrow ^4\text{I}_{15/2}$  of  $\text{Er}^{3+}$  and  $^2\text{F}_{5/2} \rightarrow ^2\text{F}_{7/2}$  of  $\text{Yb}^{3+}$  in  $\text{La}_2\text{O}_3$  sample were all stronger than that in cubic samples.

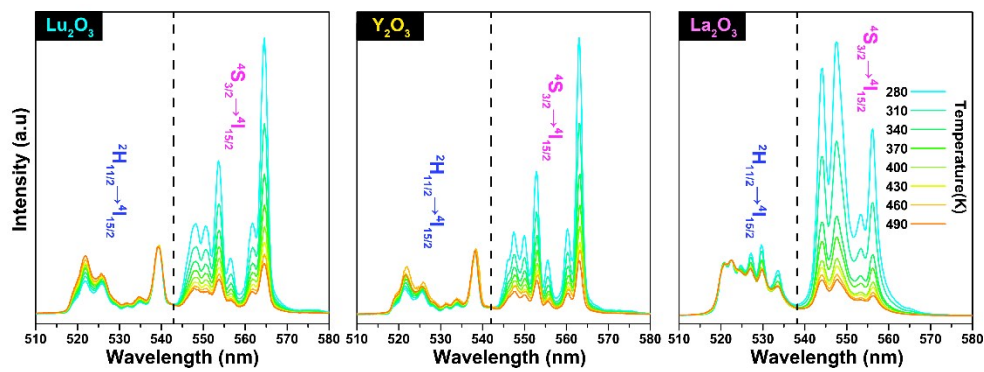

**Figure S7.** Temperature-dependent UC emission spectra of  $\text{RE}_2\text{O}_3: 2\%\text{Er}^{3+}/3\%\text{Yb}^{3+}$  (RE = Lu, Y and La) nanospheres within green region under 980 nm excitation (normalized at  $^2\text{H}_{11/2} \rightarrow ^4\text{I}_{15/2}$ ). With the increase of temperature from 280 to 490 K, the relative emission intensity of  $^4\text{S}_{3/2} \rightarrow ^4\text{I}_{15/2}$  monotonously declined in three samples without obvious change in band position.



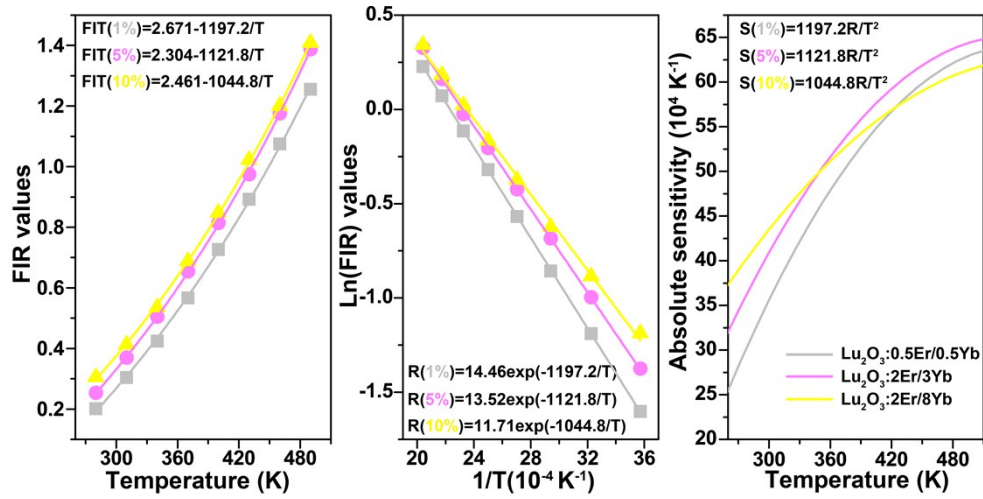

**Figure S8.** Temperature-dependent FIR and absolute sensitivity based on green emission in  $\text{Lu}_2\text{O}_3$  doping with different  $\text{Er}^{3+}/\text{Yb}^{3+}$  contents under 980 nm excitation. According to the optimal fitting exponential curves of experimental points, the energy separation and coefficient B were found to be  $825 \text{ cm}^{-1}$  and 14.46 ( $0.5\%\text{Er}^{3+}/0.5\%\text{Yb}^{3+}$ ),  $775 \text{ cm}^{-1}$  and 13.52 ( $2\%\text{Er}^{3+}/3\%\text{Yb}^{3+}$ ),  $721 \text{ cm}^{-1}$  and 11.71 ( $2\%\text{Er}^{3+}/8\%\text{Yb}^{3+}$ ), respectively. The obtained absolute sensitivity of samples gradually increased in our experimental range and reached to the maximum about 0.0063, 0.0064 and  $0.0061 \text{ K}^{-1}$  at the upper limit temperature 490 K.

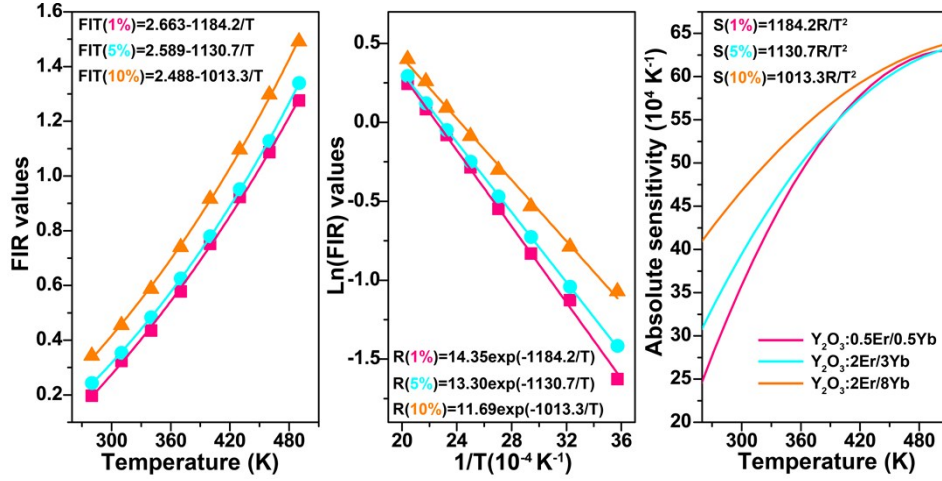

**Figure S9.** Temperature-dependent FIR and absolute sensitivity based on green emission in  $\text{Y}_2\text{O}_3$  doping with different  $\text{Er}^{3+}/\text{Yb}^{3+}$  contents under 980 nm excitation. According to the optimal fitting exponential curves of experimental points, the energy separation and coefficient B were found to be  $817 \text{ cm}^{-1}$  and 14.35 ( $0.5\%\text{Er}^{3+}/0.5\%\text{Yb}^{3+}$ ),  $780 \text{ cm}^{-1}$  and 13.3 ( $2\%\text{Er}^{3+}/3\%\text{Yb}^{3+}$ ),  $700 \text{ cm}^{-1}$  and 11.69 ( $2\%\text{Er}^{3+}/8\%\text{Yb}^{3+}$ ), respectively. The obtained absolute sensitivity of all samples gradually increased in our experimental range and reached to the maximum about  $0.0063 \text{ K}^{-1}$  at the upper limit temperature 490 K.

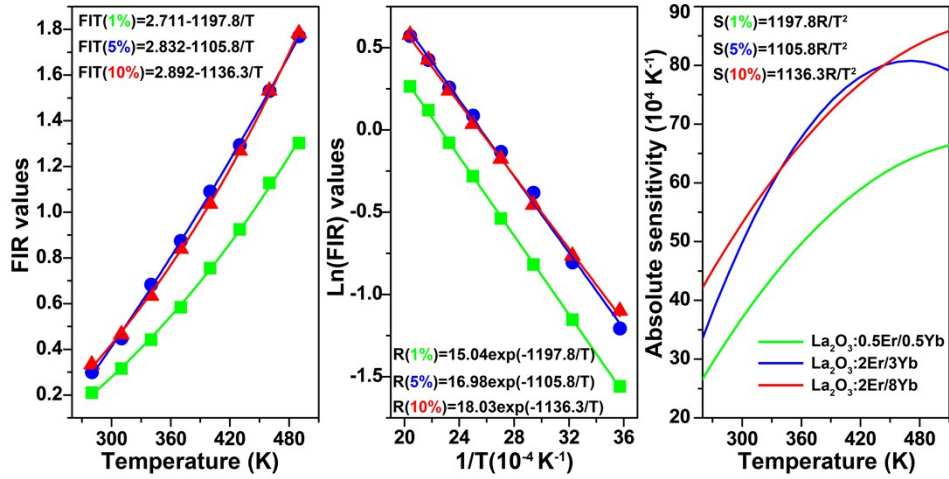

**Figure S10.** Temperature-dependent FIR and absolute sensitivity based on green emission in  $\text{La}_2\text{O}_3$  doping with different  $\text{Er}^{3+}/\text{Yb}^{3+}$  contents under 980 nm excitation. According to the optimal fitting exponential curves of experimental points, the energy separation and coefficient B were found to be  $825 \text{ cm}^{-1}$  and 15.04 ( $0.5\%\text{Er}^{3+}/0.5\%\text{Yb}^{3+}$ ),  $763 \text{ cm}^{-1}$  and 16.98 ( $2\%\text{Er}^{3+}/3\%\text{Yb}^{3+}$ ),  $784 \text{ cm}^{-1}$  and 18.03 ( $2\%\text{Er}^{3+}/8\%\text{Yb}^{3+}$ ), respectively. The obtained absolute sensitivity of three samples gradually increased in our experimental range and reached to the maximum about 0.0065, 0.0081 and  $0.0085 \text{ K}^{-1}$  at the upper limit temperature 490 K.

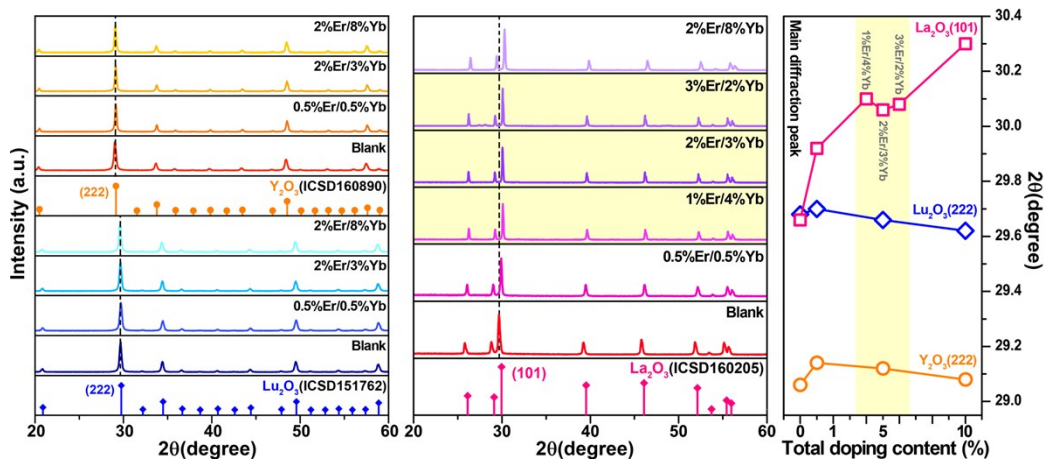

**Figure S11.** XRD patterns of  $\text{RE}_2\text{O}_3$  (RE = Lu, Y and La) nanospheres doping with different  $\text{Er}^{3+}/\text{Yb}^{3+}$  contents and the corresponding shift of the strongest diffraction peaks. All the prepared samples are purity and well-crystallized without secondary phases. It is found that continuously shift of diffraction peaks (101) from low towards the higher angles was observed with increasing total contents of  $\text{Er}^{3+}/\text{Yb}^{3+}$  in  $\text{La}_2\text{O}_3$  due to the substitution of  $\text{La}^{3+}$  by  $\text{Er}^{3+}/\text{Yb}^{3+}$  ions with much smaller radius, and the positions of (101) peak remained almost unchanged in  $\text{La}_2\text{O}_3$  with 5% total doping content ( $1\%\text{Er}^{3+}/4\%\text{Yb}^{3+}$ ,  $2\%\text{Er}^{3+}/3\%\text{Yb}^{3+}$  and  $3\%\text{Er}^{3+}/2\%\text{Yb}^{3+}$ ). However, no obvious shift were observed in diffraction peaks (222) of  $\text{Lu}_2\text{O}_3$  and  $\text{Y}_2\text{O}_3$  samples as increasing  $\text{Er}^{3+}/\text{Yb}^{3+}$  contents. Above results indicated that the introduction of  $\text{Er}^{3+}/\text{Yb}^{3+}$  would result drastic lattice shrinkage of  $\text{La}_2\text{O}_3$  crystal, yet barely affect the cell volumes of  $\text{Lu}_2\text{O}_3$  and  $\text{Y}_2\text{O}_3$  samples.

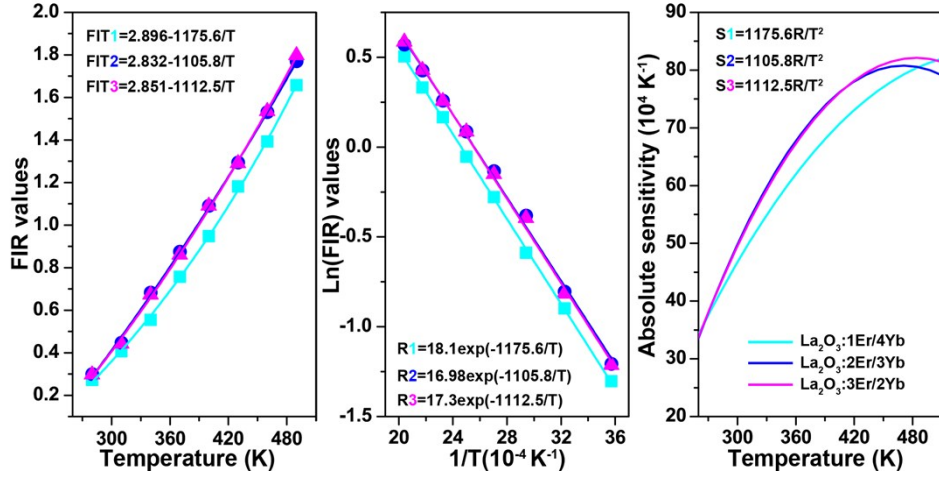

**Figure S12.** Temperature-dependent FIR and absolute sensitivity based on green emission in  $\text{La}_2\text{O}_3$  samples doping with 5% total doping content under 980 nm excitation. According to the optimal fitting exponential curves of experimental points, the energy separation and coefficient B were found to be  $810 \text{ cm}^{-1}$  and 18.1 ( $1\%\text{Er}^{3+}/4\%\text{Yb}^{3+}$ ),  $763 \text{ cm}^{-1}$  and 16.98 ( $2\%\text{Er}^{3+}/3\%\text{Yb}^{3+}$ ),  $767 \text{ cm}^{-1}$  and 17.3 ( $3\%\text{Er}^{3+}/2\%\text{Yb}^{3+}$ ), respectively. The obtained absolute sensitivity of three samples gradually increased in our experimental range and reached to the maximum about 0.0081, 0.0081 and  $0.0083 \text{ K}^{-1}$  at the upper limit temperature 490 K, indicating that the concentration-dependent energy transfer process hardly influence the sensitivity in present systems.

**Table S1.** Rietveld refinement and calculated crystallographic results for RE<sub>2</sub>O<sub>3</sub>: 2%Er<sup>3+</sup>/3%Yb<sup>3+</sup> (RE = Lu, Y and La) samples.

|                               | Lu <sub>2</sub> O <sub>3</sub> : 2%Er <sup>3+</sup> /3%Yb <sup>3+</sup> | Y <sub>2</sub> O <sub>3</sub> : 2%Er <sup>3+</sup> /3%Yb <sup>3+</sup> | La <sub>2</sub> O <sub>3</sub> : 2%Er <sup>3+</sup> /3%Yb <sup>3+</sup> |
|-------------------------------|-------------------------------------------------------------------------|------------------------------------------------------------------------|-------------------------------------------------------------------------|
| <b>Space group</b>            | <i>Ia</i> - $\bar{3}$ , cubic                                           | <i>Ia</i> - $\bar{3}$ , cubic                                          | <i>p</i> - $\bar{3}m1$ , trigonal                                       |
| <i>a</i> (Å)                  | 10.3968                                                                 | 10.5971                                                                | 3.9237                                                                  |
| <i>b</i> (Å)                  | 10.3968                                                                 | 10.5971                                                                | 3.9237                                                                  |
| <i>c</i> (Å)                  | 10.3968                                                                 | 10.5971                                                                | 6.1170                                                                  |
| $\alpha, \beta, \gamma$ (deg) | 90, 90, 90                                                              | 90, 90, 90                                                             | 90, 90, 120                                                             |
| <i>V</i> (Å <sup>3</sup> )    | 1123.83                                                                 | 1190.04                                                                | 81.56                                                                   |
| <i>Z</i>                      | 16                                                                      | 16                                                                     | 1                                                                       |
| <i>R</i> <sub>wp</sub> (%)    | 4.806                                                                   | 4.778                                                                  | 4.473                                                                   |
| <i>R</i> <sub>p</sub> (%)     | 3.158                                                                   | 3.142                                                                  | 2.879                                                                   |

**Table S2.** The indexation of SAED patterns of RE<sub>2</sub>O<sub>3</sub>: 2%Er<sup>3+</sup>/3%Yb<sup>3+</sup> (RE = Lu, Y and La) nanospheres.

| Samples                                                                 | Crystal facets                                                                  |
|-------------------------------------------------------------------------|---------------------------------------------------------------------------------|
| <b>Lu<sub>2</sub>O<sub>3</sub>: 2%Er<sup>3+</sup>/3%Yb<sup>3+</sup></b> | (211), (222), (321) and (400) of cubic-phased Lu <sub>2</sub> O <sub>3</sub>    |
| <b>Y<sub>2</sub>O<sub>3</sub>: 2%Er<sup>3+</sup>/3%Yb<sup>3+</sup></b>  | (211), (222), (321) and (400) of cubic-phased Y <sub>2</sub> O <sub>3</sub>     |
| <b>La<sub>2</sub>O<sub>3</sub>: 2%Er<sup>3+</sup>/3%Yb<sup>3+</sup></b> | (100), (002), (102) and (110) of trigonal-phased La <sub>2</sub> O <sub>3</sub> |

**Table S3.** Atomic distance of RE-RE in RE<sub>2</sub>O<sub>3</sub>: 2Er<sup>3+</sup>/3Yb<sup>3+</sup> (RE = Lu, Y and La) crystals.

| Samples                                                                 | RE-RE   | Distance (Å) |
|-------------------------------------------------------------------------|---------|--------------|
| <b>Lu<sub>2</sub>O<sub>3</sub>: 2%Er<sup>3+</sup>/3%Yb<sup>3+</sup></b> | Lu2-Lu2 | 3.4563       |
| <b>Y<sub>2</sub>O<sub>3</sub>: 2%Er<sup>3+</sup>/3%Yb<sup>3+</sup></b>  | Y2-Y2   | 3.5266       |
| <b>La<sub>2</sub>O<sub>3</sub>: 2%Er<sup>3+</sup>/3%Yb<sup>3+</sup></b> | La-La   | 3.7213       |



**Table S4.** The ionic radius of rare earth (RE<sup>3+</sup>) ions with different coordination numbers

| RE <sup>3+</sup> ions | Ionic Radius (Å, CN = 6) | RE <sup>3+</sup> ions | Ionic Radius (Å, CN = 7) |
|-----------------------|--------------------------|-----------------------|--------------------------|
| Lu <sup>3+</sup>      | 0.86                     | La <sup>3+</sup>      | 1.1                      |
| Y <sup>3+</sup>       | 0.9                      | Er <sup>3+</sup>      | 0.94                     |
| Er <sup>3+</sup>      | 0.89                     | Yb <sup>3+</sup>      | 0.92                     |
| Yb <sup>3+</sup>      | 0.87                     | Eu <sup>3+</sup>      | 1.01                     |
| Eu <sup>3+</sup>      | 0.94                     |                       |                          |
